# Supplementary material for: Preliminary Evidence of Good Safety Profile and Outcomes of Early Treatment with Tixagevimab/Cilgavimab Compared to Previously Employed Monoclonal Antibodies for COVID-19 in Immunocompromised Patients
Source: MDPI journal article supplement (doi:10.3390/biomedicines11061540), 2023-05-26
Supplement: s1 [file s1]

**Supplementary Table S1.** Signs and symptoms displayed by enrolled patients according to the treatment received.

| <b>COVID-19 signs &amp; symptoms</b> | <b>Overall, N = 108</b> | <b>mAbs, N = 89</b> | <b>TIX/CIL, N = 19</b> | <b>p-value</b> |
|--------------------------------------|-------------------------|---------------------|------------------------|----------------|
| Fever                                | 60 (56%)                | 54 (61%)            | 6 (32%)                | 0.021          |
| Cough                                | 49 (45%)                | 40 (45%)            | 9 (47%)                | 0.847          |
| Ageusia-dysgeusia                    | 2 (1.9%)                | 2 (2.2%)            | 0 (0%)                 | >0.999         |
| Anosmia                              | 4 (3.7%)                | 3 (3.4%)            | 1 (5.3%)               | 0.544          |
| Pharyngodynia                        | 38 (35%)                | 29 (33%)            | 9 (47%)                | 0.221          |
| Asthenia                             | 27 (25%)                | 20 (22%)            | 7 (37%)                | 0.243          |
| Headache                             | 27 (25%)                | 22 (25%)            | 5 (26%)                | >0.999         |
| Myalgia                              | 23 (21%)                | 19 (21%)            | 4 (21%)                | >0.999         |
| GI                                   | 11 (10%)                | 7 (7.9%)            | 4 (21%)                | 0.101          |
| Dyspnea - tachypnea                  | 2 (1.9%)                | 2 (2.2%)            | 0 (0%)                 | >0.999         |

GI: gastrointestinal tract

**Supplementary Table S2.** Monoclonal antibodies administered and doses of vaccines received among the enrolled patients.

| <b>COVID-19 signs &amp; symptoms</b> | <b>Overall, N = 108</b> | <b>mAb, N = 89</b> | <b>TIX/CIL, N = 19</b> | <b>p-value</b> |
|--------------------------------------|-------------------------|--------------------|------------------------|----------------|
| mAbs administered                    |                         |                    |                        | <0.001         |
| Tixagevimab/cilgavimab               | 19 (18%)                | 0 (0%)             | 19 (100%)              |                |
| Casirivimab/imdevimab                | 6 (5.6%)                | 6 (6.7%)           | 0 (0%)                 |                |
| Bamlanivimab/etesevimab              | 15 (14%)                | 15 (17%)           | 0 (0%)                 |                |
| Sotrovimab                           | 68 (63%)                | 68 (76%)           | 0 (0%)                 |                |
| <b>Vaccine dose(s)</b>               |                         |                    |                        | <0.001         |
| 0                                    | 6 (5.6%)                | 6 (6.8%)           | 0 (0%)                 |                |
| 1                                    | 3 (2.8%)                | 2 (2.3%)           | 1 (5.3%)               |                |
| 2                                    | 25 (23%)                | 25 (28%)           | 0 (0%)                 |                |
| 3                                    | 62 (58%)                | 55 (62%)           | 7 (37%)                |                |
| 4                                    | 11 (10%)                | 0 (0%)             | 11 (58%)               |                |
| Unknown                              | 1                       | 1                  | 0                      |                |
